# Supplementary material
Source: Springer Nature journal article supplement (https://www.springermedizin.de/resource/supplementary/12889_2014_6496_MOESM1_ESM.pdf/9498310)
Supplement: MOESM1 [file 9498310]

Met the primary inclusion criteria

Randomization 1

Receives 'Short' study invitation

Receives 'Long' study invitation

No invitation  
Untouched control group

Pre-screening

Pre-screening

Randomization 2a

Randomization 2b

Short multicomponent rehabilitation

ACT

Long multicomponent rehabilitation

Questionnaires answered at pretest, posttest, 3, 6, 12 months  
Sick leave registers after 1, 3, 5 yrs

Sick leave registers after 1, 3, 5 yrs
